# Supplementary material
Source: PubMed Central journal article supplement (PMC8676383)
Supplement: 7348_3_supp_76999_qt27x1.pdf [file 7348_3_supp_76999_qt27x1.pdf]

## Supplemental Material

**Table S1. Prevalence of frailty index components in a cross section of transplant candidates from Halifax, NS**

| FI variables by domain                         | Value        |
|------------------------------------------------|--------------|
| <b>Social/cognitive</b>                        |              |
| Socializes rarely                              | 30/104 (29%) |
| Emotional problems interfere with activities   | 14/105 (13%) |
| Cut down on work because of emotional problems | 5/105 (5%)   |
| Feeling Lonely                                 | 11/104 (11%) |
| Abnormal word recall                           | 31/111 (28%) |
| Impaired clock draw                            | 41/110 (71%) |
| <b>Functional</b>                              |              |
| Needs help with:                               |              |
| Meals                                          | 5/104 (5%)   |
| Shopping                                       | 7/104 (7%)   |
| Chores                                         | 13/104 (13%) |
| Finances                                       | 5/104 (5%)   |
| Impaired in:                                   |              |
| Carrying groceries                             | 30/103 (29%) |
| Carry ten pounds                               | 8/104 (8%)   |
| Weak grip strength                             | 23/111 (21%) |
| Cut down work due to physical health           | 30/105 (29%) |
| Cut down activity (last month)                 | 12/100 (12%) |
| <b>Mobility</b>                                |              |
| Ltd. In bending, kneeling, stooping            | 24/104 (23%) |
| Help up/down stairs                            | 4/104 (4%)   |
| Help in/out of chair                           | 2/104 (2%)   |
| Ltd. For one flight of stairs                  | 6/104 (6%)   |
| Limited walking 100m                           | 5/102 (5%)   |
| Requires a cane/walker                         | 10/103 (10%) |
| Low physical activity                          | 12/111 (11%) |
| Slow walking speed                             | 7/109 (6%)   |
| Exhaustion: self-report                        | 30/110 (27%) |
| Infrequent walking                             | 17/103 (17%) |
| <b>Comorbidity</b>                             |              |
| CHF                                            | 13/111 (12%) |
| CAD                                            | 12/111 (11%) |
| CVD                                            | 8/111 (7%)   |
| CLD                                            | 4/111 (4%)   |
| DM                                             | 28/111 (25%) |
| MSKD                                           | 26/98 (27%)  |
| Prior malignancy                               | 13/111 (12%) |
| Polypharmacy*                                  | 35/111 (32%) |
| Weight loss                                    | 18/111 (16%) |
| Low albumin**                                  | 10/111 (9%)  |
| Self-rated low health                          | 4/104 (4%)   |
| Self-rated worsening of health (last year)     | 27/101 (27%) |

CHF: congestive heart failure, CAD: coronary artery disease, CVD: cerebrovascular disease,  
CLD: chronic lung disease, DM: diabetes, MSK: musculoskeletal disease. \*>10 meds/day,  
\*\*<30 g/L

**Table S2.** Baseline characteristics

| Variable                                   | Value        |
|--------------------------------------------|--------------|
| <b>Demographics N (%) unless specified</b> |              |
| Age (yr), mean±SD                          | 54±14        |
| Age >65 yr                                 | 132 (24)     |
| Male Sex                                   | 346 (64)     |
| White race                                 | 437 (81)     |
| <b>Site</b>                                |              |
| Atlantic Canada*                           | 113 (21)     |
| Hamilton                                   | 83 (15)      |
| London                                     | 317 (59)     |
| Montreal                                   | 29 (5)       |
| <b>Cause of ESRD</b>                       |              |
| DM                                         | 152 (28)     |
| Vascular/HTN                               | 37 (7)       |
| GN                                         | 141 (26)     |
| Congenital                                 | 90 (17)      |
| Structural                                 | 39 (7)       |
| Other                                      | 83 (15)      |
| <b>Dialysis vintage yr, median and IQR</b> | 0.9 (0, 2.0) |
| <b>Dialysis type</b>                       |              |
| HD                                         | 283 (52)     |
| - Hospital HD                              | - 134 (25)   |
| - Satellite HD                             | - 115 (21)   |
| - Home HD                                  | - 34 (6)     |
| PD                                         | 110 (20.30)  |
| - CAPD                                     | - 27 (5)     |
| - CCPD                                     | - 83 (15)    |
| Pre-emptive                                | 132 (24)     |
| Unknown                                    | 17 (3)       |
| <b>Laboratory investigations</b>           |              |
| Albumin                                    | 38+/-6       |
| Hemoglobin                                 | 109+/-16     |
| Parathyroid hormone                        | 49+/-51      |
| <b>Comorbidities</b>                       |              |
| DM                                         | 209 (39)     |
| CAD                                        | 97 (18)      |
| CHF                                        | 149 (28)     |
| CVD                                        | 40 (7)       |
| PVD                                        | 40 (7)       |
| Chronic lung disease                       | 39 (7)       |
| Chronic liver disease                      | 34 (6)       |
| Previous malignancy                        | 61 (11)      |
| <b>Previous Kidney transplant</b>          | 60 (11)      |
| <b>BMI</b>                                 |              |
| Underweight (<18.5)                        | 19 (4)       |
| Normal (18.5-24.9)                         | 146 (27)     |
| Overweight (25.0-29.9)                     | 167 (31)     |
| Obese 1 (30.0-34.9)                        | 126 (23)     |
| Obese 2 (35.0-39.9)                        | 56 (10)      |
| Obese 3 (>= 40.0)                          | 28 (5)       |

|                                                                                                                                                                                                                                                                                                       |                 |
|-------------------------------------------------------------------------------------------------------------------------------------------------------------------------------------------------------------------------------------------------------------------------------------------------------|-----------------|
| <b>Karnofsky Performance Scale</b>                                                                                                                                                                                                                                                                    |                 |
| Fully active                                                                                                                                                                                                                                                                                          | 294 (54)        |
| Ambulatory, light work                                                                                                                                                                                                                                                                                | 180 (33)        |
| Ambulatory, self-care                                                                                                                                                                                                                                                                                 | 30 (6)          |
| Limited self-care, 50% of time in bed                                                                                                                                                                                                                                                                 | 3 (1)           |
| Disabled                                                                                                                                                                                                                                                                                              | 2 (0)           |
| Unknown                                                                                                                                                                                                                                                                                               | 33 (6)          |
| <b>Activated to waitlist</b>                                                                                                                                                                                                                                                                          | <b>339 (63)</b> |
| ESRD: end stage renal disease, DM: diabetes, GN: glomerulonephritis, HD: hemodialysis, PD: peritoneal dialysis, CAPD: continuous ambulatory PD, CCPD: chronic cycling PD, CAD: coronary artery disease, CHF: congestive heart failure, CVD: cerebrovascular disease, PVD: peripheral vascular disease |                 |

**Table S3.** Differences in demographics among patients by frailty status according to the Frailty Phenotype

| Variable                                                                                                                                                                                                                                                                                              | Frail patients (n=88, 16%) | Non-frail patients (n = 454, 84%) | p-value |
|-------------------------------------------------------------------------------------------------------------------------------------------------------------------------------------------------------------------------------------------------------------------------------------------------------|----------------------------|-----------------------------------|---------|
| <b>Demographics</b>                                                                                                                                                                                                                                                                                   |                            |                                   |         |
| Age (yr), mean±SD                                                                                                                                                                                                                                                                                     | 58±14                      | 54±14                             |         |
| Age >65 yr N (%)                                                                                                                                                                                                                                                                                      | 36 (41)                    | 96 (21)                           | <0.001  |
| Male Sex N (%)                                                                                                                                                                                                                                                                                        | 51 (58)                    | 295 (65)                          | 0.226   |
| White race N (%)                                                                                                                                                                                                                                                                                      | 73 (83)                    | 364 (80)                          | 0.659   |
| <b>Site N (%)</b>                                                                                                                                                                                                                                                                                     |                            |                                   | 0.209   |
| Atlantic Canada*                                                                                                                                                                                                                                                                                      | 11 (13)                    | 102 (23)                          |         |
| Hamilton                                                                                                                                                                                                                                                                                              | 14 (16)                    | 69 (15)                           |         |
| London                                                                                                                                                                                                                                                                                                | 60 (68)                    | 257 (57)                          |         |
| Montreal                                                                                                                                                                                                                                                                                              | 3 (3)                      | 26 (6)                            |         |
| <b>Cause of ESRD N (%)</b>                                                                                                                                                                                                                                                                            |                            |                                   | 0.261   |
| DM                                                                                                                                                                                                                                                                                                    | 35 (40)                    | 117 (26)                          |         |
| Vascular/HTN                                                                                                                                                                                                                                                                                          | 5 (6)                      | 32 (7)                            |         |
| GN                                                                                                                                                                                                                                                                                                    | 20 (23)                    | 121 (27)                          |         |
| Congenital                                                                                                                                                                                                                                                                                            | 12 (14)                    | 78 (17)                           |         |
| Structural                                                                                                                                                                                                                                                                                            | 5 (6)                      | 34 (8)                            |         |
| Other                                                                                                                                                                                                                                                                                                 | 11 (13)                    | 72 (16)                           |         |
| <b>Dialysis vintage yr, median (IQR)</b>                                                                                                                                                                                                                                                              | 1.2 (0.4, 2.2)             | 0.8 (0, 2.0)                      | 0.034   |
| <b>Dialysis type N (%)</b>                                                                                                                                                                                                                                                                            |                            |                                   | 0.060   |
| HD                                                                                                                                                                                                                                                                                                    | 54 (61)                    | 229 (50)                          |         |
| PD                                                                                                                                                                                                                                                                                                    | 20 (23)                    | 90 (20)                           |         |
| Pre-emptive                                                                                                                                                                                                                                                                                           | 13 (15)                    | 119 (26)                          |         |
| Unknown                                                                                                                                                                                                                                                                                               | 1 (1)                      | 16 (4)                            |         |
| <b>Comorbidities N (%)</b>                                                                                                                                                                                                                                                                            |                            |                                   |         |
| DM                                                                                                                                                                                                                                                                                                    | 45 (51)                    | 164 (36)                          | 0.012   |
| CAD                                                                                                                                                                                                                                                                                                   | 25 (28)                    | 72 (16)                           | 0.009   |
| CHF                                                                                                                                                                                                                                                                                                   | 28 (32)                    | 120 (27)                          | 0.361   |
| CVD                                                                                                                                                                                                                                                                                                   | 12 (14)                    | 28 (6)                            | 0.023   |
| PVD                                                                                                                                                                                                                                                                                                   | 9 (10)                     | 31 (7)                            | 0.267   |
| Chronic lung disease                                                                                                                                                                                                                                                                                  | 5 (6)                      | 31 (8)                            | 0.657   |
| Chronic liver disease                                                                                                                                                                                                                                                                                 | 6 (7)                      | 28 (6)                            | 0.811   |
| Previous malignancy                                                                                                                                                                                                                                                                                   | 14 (16)                    | 47 (10)                           | 0.141   |
| <b>Previous Kidney transplant N (%)</b>                                                                                                                                                                                                                                                               | 6 (7)                      | 54 (12)                           | 0.196   |
| <b>BMI N (%)</b>                                                                                                                                                                                                                                                                                      |                            |                                   | 0.672   |
| Underweight (<18.5)                                                                                                                                                                                                                                                                                   | 2 (2)                      | 17 (4)                            |         |
| Normal (18.5-24.9)                                                                                                                                                                                                                                                                                    | 24 (27)                    | 122 (27)                          |         |
| Overweight (25.0-29.9)                                                                                                                                                                                                                                                                                | 26 (30)                    | 141 (31)                          |         |
| Obese 1 (30.0-34.9)                                                                                                                                                                                                                                                                                   | 22 (25)                    | 104 (23)                          |         |
| Obese 2 (35.0-39.9)                                                                                                                                                                                                                                                                                   | 12 (14)                    | 44 (10)                           |         |
| Obese 3 (>= 40.0)                                                                                                                                                                                                                                                                                     | 2 (2)                      | 26 (6)                            |         |
| ESRD: end stage renal disease, DM: diabetes, GN: glomerulonephritis, HD: hemodialysis, PD: peritoneal dialysis, CAPD: continuous ambulatory PD, CCPD: chronic cycling PD, CAD: coronary artery disease, CHF: congestive heart failure, CVD: cerebrovascular disease, PVD: peripheral vascular disease |                            |                                   |         |

**Table S4.** Frailty index and Clinical frailty scale scores for the overall population and across subgroups

|                                   | <b>CFS, median (IQR)</b> | <b>FI, mean±SD</b>          |
|-----------------------------------|--------------------------|-----------------------------|
| <b>Prevalence of frailty*</b>     | 15%                      | 34%                         |
| <b>Total</b>                      | 3 (2,3)                  | 0.223 ± 0.137, max<br>0.703 |
| <b>Variable</b>                   |                          |                             |
| <b>Age</b>                        |                          |                             |
| >65 yr                            | 3 (2,3)                  | 0.250 ± 0.148               |
| <65 yr                            | 2 (2,3)                  | 0.213 ± 0.132               |
| <b>Sex</b>                        |                          |                             |
| Male                              | 2 (2,3)                  | 0.220 ± 0.130               |
| Female                            | 3 (2,3)                  | 0.228 ± 0.147               |
| <b>Race</b>                       |                          |                             |
| White                             | 2.5 (2,3)                | 0.222 ± 0.138               |
| Non-white                         | 3 (2,3)                  | 0.226 ± 0.131               |
| <b>Site</b>                       |                          |                             |
| Atlantic Canada*                  | 3 (2,3)                  | 0.204 ± 0.127               |
| Hamilton                          | 3 (2,4)                  | 0.248 ± 0.138               |
| London                            | 2 (2,3)                  | 0.229 ± 0.140               |
| Montreal                          | 2 (1,4)                  | 0.151 ± 0.107               |
| <b>Cause of ESRD</b>              |                          |                             |
| DM                                | 3 (2,3)                  | 0.277 ± 0.141               |
| Vascular/HTN                      | 2 (2,3)                  | 0.209 ± 0.109               |
| GN                                | 2 (2,3)                  | 0.200 ± 0.126               |
| Congenital                        | 2 (2,3)                  | 0.187 ± 0.127               |
| Structural                        | 2 (2,3)                  | 0.206 ± 0.115               |
| Other                             | 3 (2,3)                  | 0.213 ± 0.151               |
| <b>Dialysis vintage</b>           |                          |                             |
| >1 year                           | 3 (2,4)                  | 0.246 ± 0.137               |
| <1 year                           | 2 (2,3)                  | 0.202 ± 0.133               |
| <b>Dialysis type</b>              |                          |                             |
| HD                                | 3 (2,3)                  | 0.240 ± 0.142               |
| PD                                | 3 (2,3)                  | 0.250 ± 0.125               |
| Pre-emptive                       | 2 (2,3)                  | 0.173 ± 0.120               |
| <b>Comorbidities</b>              |                          |                             |
| Diabetes                          | 3 (2,3)                  | 0.274 ± 0.137               |
| CAD                               | 3 (2,3)                  | 0.296 ± 0.138               |
| CHF                               | 3 (2,3)                  | 0.283 ± 0.144               |
| CVD                               | 3 (3,4)                  | 0.323 ± 0.153               |
| PVD                               | 3 (2,3)                  | 0.274 ± 0.150               |
| Chronic lung disease              | 3 (2,4)                  | 0.248 ± 0.112               |
| Chronic liver disease             | 2 (2,3)                  | 0.218 ± 0.163               |
| Previous malignancy               | 3 (2,3)                  | 0.267± 0.142                |
| <b>Previous Kidney transplant</b> | 2 (2,3)                  | 0.227 ± 0.136               |
| <b>BMI</b>                        |                          |                             |
| Underweight (<18.5)               | 3 (2,3)                  | 0.236 ± 0.153               |
| Normal (18.5-24.9)                | 2 (2,3)                  | 0.204 ± 0.128               |
| Overweight (25.0-29.9)            | 2.5 (2,3)                | 0.221 ± 0.141               |
| Obese 1 (30.0-34.9)               | 3 (2,3)                  | 0.241 ± 0.127               |
| Obese 2 (35.0-39.9)               | 3 (2,3)                  | 0.251 ± 0.159               |
| Obese 3 (>= 40.0)                 | 3 (2,4)                  | 0.182 ± 0.123               |

ESRD: end stage renal disease, DM: diabetes, GN: glomerulonephritis, HD: hemodialysis, PD: peritoneal dialysis, CAPD: continuous ambulatory PD, CCPD: chronic cycling PD, CAD: coronary artery disease, CHF: congestive heart failure, CVD: cerebrovascular disease, PVD: peripheral vascular disease  
\*Using predefined cutoffs of  $\geq 4$  for the CFS and  $\geq 0.25$  for the FI

**Table S5.** Clinical factors associated with frailty as measured by the FI, and CFS treated as continuous variables

| <b>Variable</b>                                                                                                                           | <b>FI</b>                                              | <b>CFS</b>                                             |
|-------------------------------------------------------------------------------------------------------------------------------------------|--------------------------------------------------------|--------------------------------------------------------|
|                                                                                                                                           | Adjusted beta coefficient<br>(95% confidence interval) | Adjusted beta coefficient<br>(95% confidence interval) |
| <b>Age&gt;65</b>                                                                                                                          | 0.0128 (-0.0123, 0.0378)                               | <b>0.299 (0.108, 0.490)</b>                            |
| <b>Male sex</b>                                                                                                                           | <b>-0.0223 (-0.0443, -0.0005)</b>                      | <b>-0.199 (-0.367, -0.031)</b>                         |
| <b>DM</b>                                                                                                                                 | <b>0.0674 (0.0454, 0.0894)</b>                         | <b>0.328 (0.160, 0.496)</b>                            |
| CAD                                                                                                                                       | <b>0.0438 (0.0143, 0.0733)</b>                         | 0.143 (-0.081, 0.368)                                  |
| CHF                                                                                                                                       | <b>0.0627 (0.0389, 0.0865)</b>                         | 0.022 (-0.160, 0.203)                                  |
| CVD                                                                                                                                       | <b>0.0808 (0.0402, 0.1215)</b>                         | <b>0.389 (0.081, 0.697)</b>                            |
| PVD                                                                                                                                       | <b>0.0135 (-0.0275, 0.0545)</b>                        | 0.163 (-0.148, 0.474)                                  |
| Chronic lung disease                                                                                                                      | -0.0017 (-0.0421, 0.0386)                              | 0.248 (-0.062, 0.557)                                  |
| Chronic liver disease                                                                                                                     | 0.0037 (-0.0392, 0.0465)                               | 0.135 (-0.194, 0.464)                                  |
| Dialysis vintage > 1 year                                                                                                                 | 0.0211 (-0.0003, 0.0425)                               | <b>0.421 (0.083, 0.585)</b>                            |
| DM: diabetes, CAD: coronary artery disease, CHF: congestive heart failure, CVD: cerebrovascular disease, PVD: peripheral vascular disease |                                                        |                                                        |



**Table S6.** Agreement between frailty assessment tools represented as kappa coefficients for the sensitivity analysis population

| <b>Assessment tools</b>                                                                                                                                                                                                                                                      | <b>Kappa coefficients</b> | <b>Simple agreement</b> |
|------------------------------------------------------------------------------------------------------------------------------------------------------------------------------------------------------------------------------------------------------------------------------|---------------------------|-------------------------|
| <b>FP vs FI</b>                                                                                                                                                                                                                                                              | 0.404                     | 0.799                   |
| <b>FP vs FI32</b>                                                                                                                                                                                                                                                            | 0.206                     | 0.714                   |
| <b>FP vs CFS</b>                                                                                                                                                                                                                                                             | 0.232                     | 0.809                   |
| <b>FI37 vs CFS</b>                                                                                                                                                                                                                                                           | 0.302                     | 0.764                   |
| <b>FI32 vs CFS</b>                                                                                                                                                                                                                                                           | 0.308                     | 0.750                   |
| <b>WT vs FP</b>                                                                                                                                                                                                                                                              | 0.554                     | 0.875                   |
| FP: frailty phenotype, FI: frailty index, FI32: Frailty Index with Frailty Phenotype components removed, CFS: clinical frailty scale, WT: walk time<br>Using predefined cutoffs of $\geq 4$ for the CFS, $\geq 0.25$ for the FI, and the FP definition for impaired walktime |                           |                         |

**Table S7.** Diagnostic characteristics of frailty screening tools for the sensitivity analysis population

|                                                                                                                                                                                                                                                                                                                                                                                                                     | <b>Sensitivity*</b> | <b>Specificity*</b> | <b>PPV*</b> | <b>NPV*</b> | <b>AUC</b>           |
|---------------------------------------------------------------------------------------------------------------------------------------------------------------------------------------------------------------------------------------------------------------------------------------------------------------------------------------------------------------------------------------------------------------------|---------------------|---------------------|-------------|-------------|----------------------|
| <b>FI vs FP</b>                                                                                                                                                                                                                                                                                                                                                                                                     | 0.750               | 0.807               | 0.393       | 0.951       | 0.837 (0.767, 0.908) |
| <b>FI34 vs FP</b>                                                                                                                                                                                                                                                                                                                                                                                                   | 0.594               | 0.771               | 0.302       | 0.919       | 0.783 (0.702, 0.864) |
| <b>FI32 vs FP</b>                                                                                                                                                                                                                                                                                                                                                                                                   | 0.563               | 0.740               | 0.265       | 0.910       | 0.734 (0.642, 0.827) |
| <b>CFS vs FP</b>                                                                                                                                                                                                                                                                                                                                                                                                    | 0.156               | 0.963               | 0.417       | 0.870       | 0.693 (0.601, 0.784) |
| <b>WT vs FP</b>                                                                                                                                                                                                                                                                                                                                                                                                     | 0.719               | 0.927               | 0.622       | 0.952       | 0.889 (0.823, 0.955) |
| PPV: positive predictive value, NPV: negative predictive value, FI: frailty index, FP: frailty phenotype, FI34: Frailty Index including only data able to be acquired remotely, FI32: Frailty Index with Frailty Phenotype components removed, CFS: clinical frailty scale, WT: walk time<br>*Using predefined cutoffs of $\geq 5$ for the CFS, $\geq 0.25$ for the FI, and the FP definition for impaired walktime |                     |                     |             |             |                      |

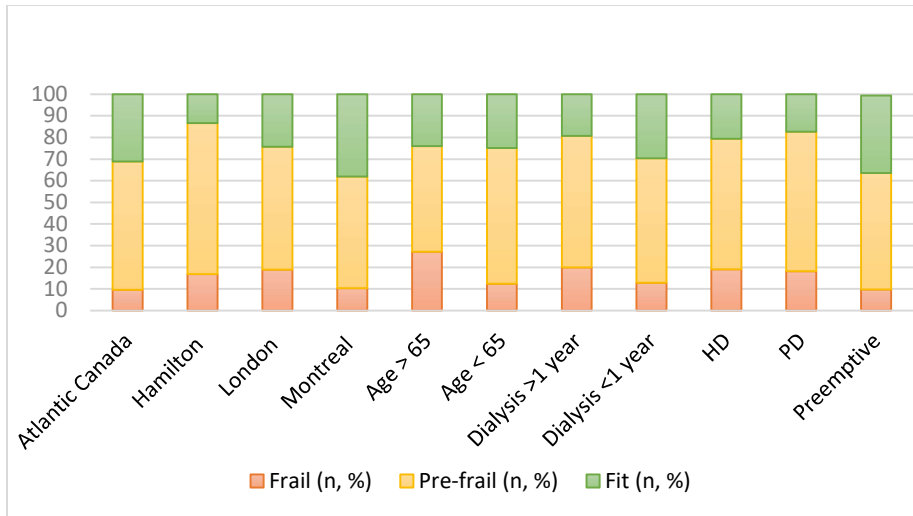

HD: Hemodialysis, PD: Peritoneal Dialysis

**Figure S1.** Prevalence of frailty by FP among subgroups

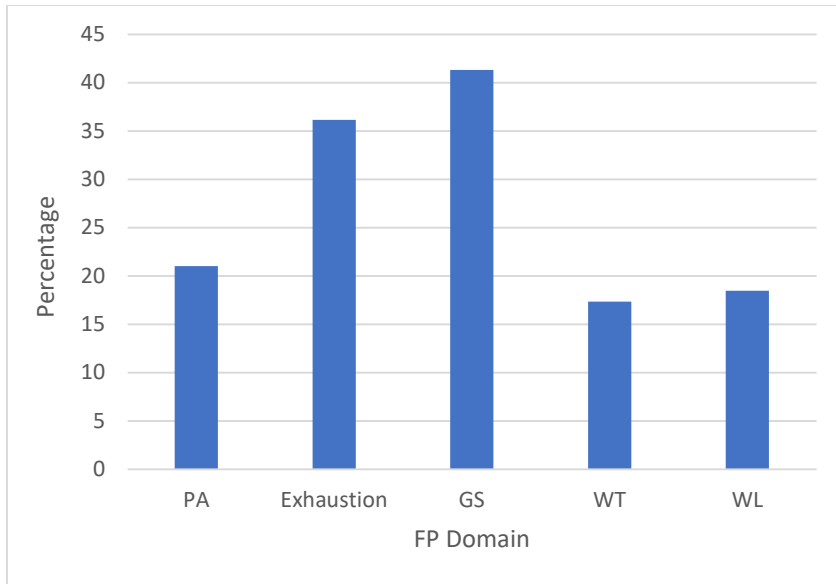

PA: Physical activity, GS: Grip strength, WT: Walk time, WL: Weight loss

A)

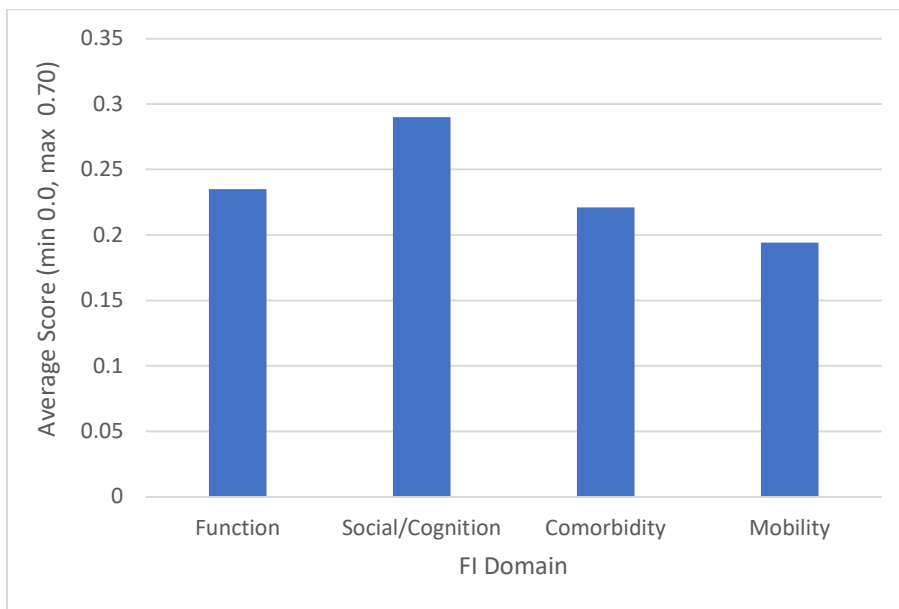

B)

**Figure S2.** Prevalence of individual components of the Frailty Phenotype (A) as well as mean FI scores by domain (B)
